# Supplementary material
Source: PubMed Central journal article supplement (PMC8440483)
Supplement: NIHMS1724778-supplement-Supplementary_Data.pdf [file NIHMS1724778-supplement-Supplementary_Data.pdf]

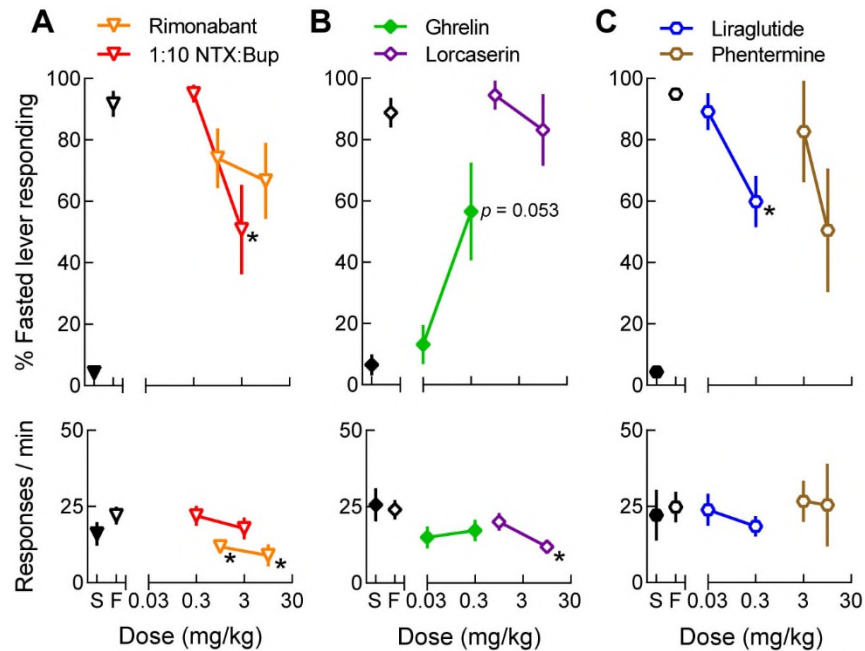

**Figure S1. Effects of orexigenic and anorexigenic compounds on interoceptive hunger and satiety cues. Related to Figure 2.**

**(A) Left segment;** ‘S’: sated mice pretreated with saline; ‘F’ fasted mice pretreated with saline. *Right segment;* the anorexigenic cannabinoid receptor 1 antagonist rimonabant in fasted mice did not significantly alter fasted-associated lever responding ( $F(1.68, 8.39) = 2.81, p = 0.12$ ) but did decrease response rate ( $F(1.94, 9.67) = 10.31, p = 0.0042$ ; Dunnett’s post-tests: F vs. 1 mg/kg,  $*p = 0.026$ , F vs. 10 mg/kg,  $*p = 0.018$ ). The anorexigenic combination of the  $\mu$ -opioid receptor antagonist naltrexone (NTX) and the dopamine-norepinephrine reuptake inhibitor bupropion (BUP) (1 NTX: 10 BUP ratio, data plotted by BUP dose) in fasted mice decreased fasted-associated lever responding ( $F(1.07, 5.33) = 10.45, p = 0.020$ ; Dunnett’s post-test: F vs. 3:30 mg/kg,  $*p = 0.026$ ) but did not significantly affect response rate ( $F(1.30, 6.52) = 1.45, p = 0.29$ ).  $n = 6$  mice per group for all tests.

**(B) Left segment;** ‘S’: sated mice pretreated with saline; ‘F’ fasted mice pretreated with saline. *Right segment;* the orexigenic hormone ghrelin in sated mice significantly increased fasted-associated lever responding ( $F(1.13, 5.65) = 8.74, p = 0.026$ ; Dunnett’s post-test: S vs. 1 mg/kg,  $p = 0.053$ ) but did not affect response rate ( $F(1.06, 5.30) = 0.11, p = 0.763$ ). The anorexigenic 5-HT<sub>2C</sub> receptor agonist lorcaserin in fasted mice did not decrease fasted-associated lever responding ( $F(1.28, 6.41) = 1.14, p = 0.35$ ) but did significantly decrease response rate ( $F(1.64,$

8.18) = 9.00,  $p = 0.011$ ; Dunnett's post-test: F vs. 10 mg/kg,  $*p = 0.020$ ).  $n = 6$  mice per group for all tests.

**(C)** *Left segment*; 'S': sated mice pretreated with saline; 'F' fasted mice pretreated with saline. *Right segment*; the anorexigenic glucagon-like peptide-1 receptor agonist liraglutide in fasted mice significantly decreased fasted-associated lever responding ( $F(1.93, 9.63) = 13.83$ ,  $p = 0.0016$ ; Dunnett's post-test: F vs. 0.3 mg/kg,  $*p = 0.011$ ) but did not affect response rate ( $F(1.89, 9.47) = 0.99$ ,  $p = 0.40$ ). The amphetamine-like anorexigenic phentermine in fasted mice did not affect fasted-associated lever responding ( $F(1.80, 9.01) = 3.29$ ,  $p = 0.088$ ) or response rate ( $F(1.21, 6.05) = 0.021$ ,  $p = 0.92$ ).  $n = 6$  mice per group for all tests.

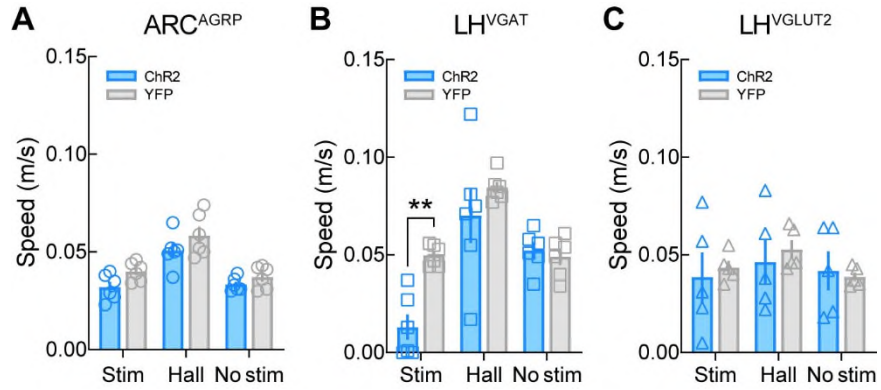

**Figure S2. Real-time place preference effects of ARC<sup>AGRP</sup>, LH<sup>VGAT</sup>, and LH<sup>VGLUT2</sup> neuronal activation. Related to Figure 3.**

**(A)** ARC<sup>AGRP</sup> activation had no effect on average speed ( $n = 6$  mice per group;  $F(2, 20) = 0.83$ ,  $p = 0.45$ ).

**(B)** LH<sup>VGAT</sup> activation significantly decreased average speed ( $n = 6$  mice per group;  $F(2, 20) = 4.91$ ,  $p = 0.018$ ; Bonferroni's post-test:  $**p = 0.0021$ ).

**(C)** LH<sup>VGLUT2</sup> activation had no effect on average speed ( $n = 5$  mice per group;  $F(2, 16) = 0.36$ ,  $p = 0.70$ ).

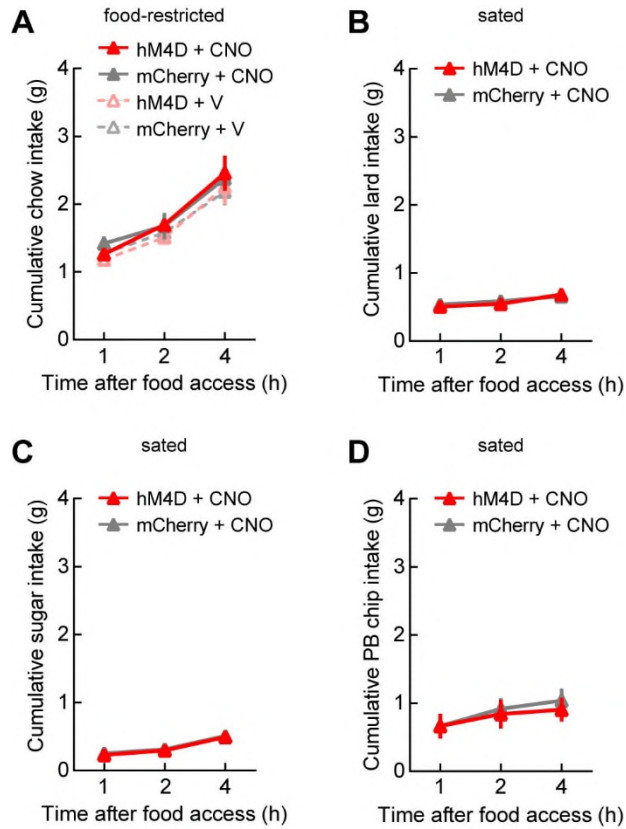

**Figure S3. LH<sup>VGLUT2</sup> inhibition did not alter caloric food intake. Related to Figure 3.**

**(A)** No changes in standard chow intake (three-way mixed-model ANOVA only revealed a significant main effect of time,  $F(2, 16) = 111.0$ ,  $p < 0.0001$ ).  $n = 5$  mice per group.

**(B)** No changes in lard intake (two-way repeated-measures ANOVA group  $\times$  time interaction:  $F(2, 16) = 0.48$ ,  $p = 0.63$ ).  $n = 5$  mice per group.

**(C)** No changes in sucrose intake ( $F(2, 16) = 0.020$ ,  $p = 0.98$ ).  $n = 5$  mice per group.

**(D)** No changes in peanut butter chip intake ( $F(2, 16) = 0.30$ ,  $p = 0.74$ ).  $n = 5$  mice per group.

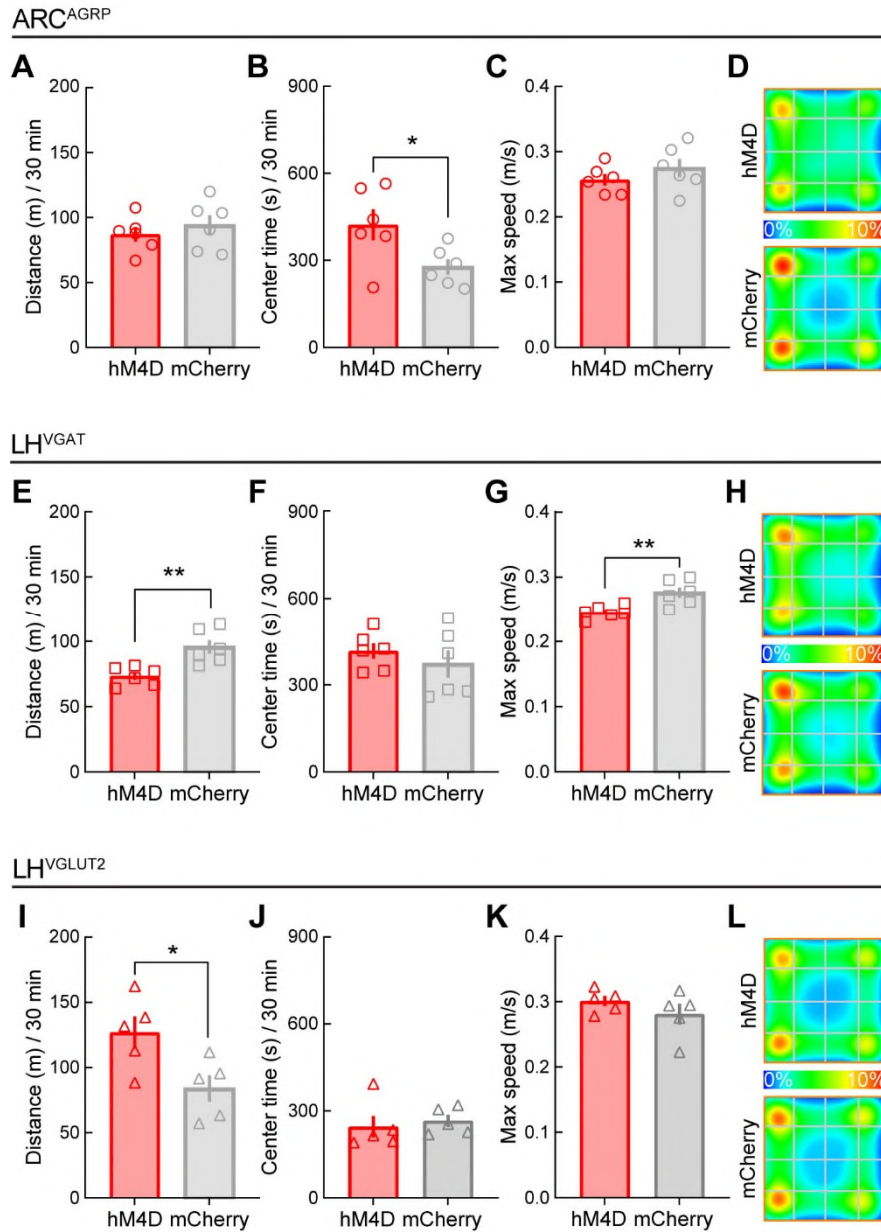

**Figure S4. Effects of ARC<sup>AGRP</sup>, LH<sup>VGAT</sup>, and LH<sup>VGLUT2</sup> inhibition in the open field test. Related to Figure 3.**

**(A)** ARC<sup>AGRP</sup> inhibition did not affect total distance ( $t(10) = 0.74$ ,  $p = 0.48$ ), **(B)** did increase center zone time ( $t(10) = 2.43$ ,  $*p = 0.035$ ), and **(C)** did not affect maximum speed ( $t(10) = 1.09$ ,  $p = 0.30$ ).  $n = 6$  mice per group.

**(D)** ARC<sup>AGRP</sup> group average location open field heat maps ( $n = 6$  mice per group). Scale is percentage of time spent in location.

**(E)** LH<sup>VGAT</sup> inhibition decreased total distance ( $t(10) = 3.70$ ,  $**p = 0.0041$ ), **(F)** did not affect center zone time ( $t(10) = 0.84$ ,  $p = 0.42$ ), and **(G)** decreased maximum speed ( $t(10) = 3.39$ ,  $**p = 0.0069$ ).  $n = 6$  mice per group.

**(H)** LH<sup>VGAT</sup> group average location open field heat maps ( $n = 6$  for each group). Scale is percentage of time spent in location.

**(I)** LH<sup>VGLUT2</sup> inhibition increased total distance ( $t(8) = 2.67$ ,  $*p = 0.029$ ) but did not affect **(J)** center zone time ( $t(8) = 0.46$ ,  $p = 0.66$ ) or **(K)** maximum speed ( $t(8) = 1.14$ ,  $p = 0.29$ ).  $n = 5$  mice per group.

**(L)** LH<sup>VGLUT2</sup> group average location open field heat maps ( $n = 5$  mice per group). Scale is percentage of time spent in location.
